# Supplementary material for: Decitabine-Induced Changes in Human Myelodysplastic Syndrome Cell Line SKM-1 Are Mediated by FOXO3A Activation
Source: J Immunol Res. 2017 Oct 16;2017:4302320. doi: 10.1155/2017/4302320 (PMC5662805; doi:10.1155/2017/4302320)
Supplement: Supplementary file 1 — Supplementary Table 1: Primary antibodies and its sources. [file 4302320.f1.xls]

## Sheet: Sheet1
Antibody	Catalogue numbers	Sources
BCL2L11	#2819	Cell Signaling Technology
MYC	#5605	Cell Signaling Technology
FASLG	#4273	Cell Signaling Technology
FOXO3A	#2497	Cell Signaling Technology
Phospho-FOXO3A	#13129	Cell Signaling Technology
CDKN1A	#2947	Cell Signaling Technology
CDKN1B	#3686	Cell Signaling Technology
Autophagy Antibody Sampler Kit	#4445	Cell Signaling Technology
GAPDH	#8884	Cell Signaling Technology
